1 **Title:** Co-opted transposons help perpetuate conserved higher-order chromosomal structures

2

3 **Short title:** Co-opted TEs maintain conserved 3D genome

4

5 **One-sentence summary:** Co-option of transposable elements maintains conserved 3D  
6 genome structures via CTCF binding site turnover in human and mouse.

7

8 **Authors:** Mayank NK Choudhary<sup>1</sup>, Ryan Z Friedman<sup>1</sup>, Julia T Wang<sup>1</sup>, Hyo Sik Jang<sup>1</sup>, Xiaoyu  
9 Zhuo PhD<sup>1</sup>, Ting Wang PhD<sup>1,\*</sup>

10

11 **Affiliations:** <sup>1</sup>The Edison Family Center for Genome Sciences & Systems Biology, Department  
12 of Genetics, Washington University, St. Louis, MO

13

14 \*Corresponding author:

15 Ting Wang, PhD, Department of Genetics,

16 Washington University School of Medicine, 4515 McKinley Avenue

17 Campus Box 8510

18 St. Louis, MO 63110, USA.

19 Phone: (314) 286-0865

20 E-mail address: [twang@genetics.wustl.edu](mailto:twang@genetics.wustl.edu)

21 3782 Words

22 0 Table

23 4 Figures

24 **ABSTRACT (227 words)**

25 Transposable elements (TEs) make up half of mammalian genomes and shape genome  
26 regulation by harboring binding sites for regulatory factors. These include architectural  
27 proteins—such as CTCF, RAD21 and SMC3—that are involved in tethering chromatin loops and  
28 marking domain boundaries. The 3D organization of the mammalian genome is intimately  
29 linked to its function and is remarkably conserved. However, the mechanisms by which these  
30 structural intricacies emerge and evolve have not been thoroughly probed. Here we show that  
31 TEs contribute extensively to both the formation of species-specific loops in humans and mice  
32 via deposition of novel anchoring motifs, as well as to the maintenance of conserved loops  
33 across both species via CTCF binding site turnover. The latter function demonstrates the ability  
34 of TEs to contribute to genome plasticity and reinforce conserved genome architecture as  
35 redundant loop anchors. Deleting such candidate TEs in human cells leads to a collapse of such  
36 conserved loop and domain structures. These TEs are also marked by reduced DNA  
37 methylation and bear mutational signatures of hypomethylation through evolutionary time.  
38 TEs have long been considered a source of genetic innovation; by examining their contribution  
39 to genome topology, we show that TEs can contribute to regulatory plasticity by inducing  
40 redundancy and potentiating genetic drift locally while conserving genome architecture  
41 globally, revealing a paradigm for defining regulatory conservation in the noncoding genome  
42 beyond classic sequence-level conservation.

43

44 **Keywords: 3D genome, loops, evolution, conservation, transposable elements, binding**  
45 **site turnover**

## 46 BACKGROUND

47 The 3D organization of various genomes has been mapped at high resolution using a  
48 variety of methods (1-5). While genome folding is largely conserved in mammals (1,4), the  
49 genetic forces shaping its emergence and evolution remain poorly understood. Two distinct  
50 yet mutually non-exclusive models (6) have recently gained much traction: that of phase  
51 separation (7) and of loop extrusion (8,9) by factors such as CTCF. In relation to the latter, TEs  
52 are known to contain and disseminate functional regulatory sequences (10-13) including that of  
53 CTCF. In contrast to relying on point mutations to evolve a functional CTCF binding site, TE  
54 transposition presents an attractive model for rapid regulatory sequence dissemination and  
55 regime building (14-17). Hence, we hypothesized that TEs have been a rich source of sequence  
56 for the assembly and tinkering of higher-order chromosomal structures. We studied the  
57 influence of all repetitive elements (REs) in establishing higher-order chromosomal structures  
58 and, more specifically, the role of TEs in the evolution of these higher-order chromosomal  
59 structures in humans and mice.

60

## 61 RESULTS

62 We examined REs' contribution to loop anchor CTCF sites using published genome-  
63 wide chromosomal conformation capture data from assays including ChIA-PET (2) and Hi-C in  
64 human (GM12878, HeLa, HMEC, IMR90, K562, NHEK) and mouse (ESCs, NSCs, CH12-LX) cell  
65 lines (1). We determined that 398 out of 3159 (12.6%) unique loop anchor CTCF sites were  
66 derived from REs in the mouse lymphoblastoid cell line. These RE-derived CTCF sites help  
67 establish 451 out of 2718 (16.6%) loops with discernible, unique CTCF loop anchors (Fig 1A, B).  
68 In the corresponding human lymphoblastoid cell line, REs contributed 935 out of 8324 (11.2%)  
69 unique loop anchor CTCF sites that help establish 1244 out of 8007 (15.6%) loops. Overall, REs  
70 contributed 9-15% of the anchor CTCF sites that result in 12-18% loops in humans and 12-23%  
71 of the anchor CTCF sites that result in 15-27% loops in mouse, across a variety of cell lines (Fig  
72 1A, B).

73 In both species, RE-derived loop anchor CTCF sites were largely derived from TEs  
74 (>95%) and their class of origin (SINE, LINE, LTR, DNA) showed a species-biased distribution

75 (Fig 1C). Using the highest resolution *in-situ* HiC maps in matched lymphoblastoid cell types in  
76 mice (CH12-LX) and humans (GM12878), we compared the composition of the RE-derived loop  
77 anchor CTCF sites. While the mouse lineage was profoundly shaped by the SINEs (70%, 4x  
78 enrichment over background), the human lineage was overrepresented by retroviral LTR  
79 elements and DNA transposons (36% and 22%, 2x and 3x enriched over the background  
80 respectively) (Fig 1D). At the family level, the B2 SINEs in mice were 13-fold enriched over  
81 background and contributed 65% of TE-derived loop anchor CTCF sites. In humans, the hAT-  
82 Charlie family of DNA transposons contributed 13% of TE-derived loop anchor CTCF sites, a 4-  
83 fold enrichment over background (Fig 1E). These contributions are underestimates as we have  
84 yet to (i) uniquely identify all loop anchor CTCF sites (especially in repetitive regions), and (ii)  
85 annotate all repetitive elements, especially ancient TEs that have diverged far from their  
86 identity (18). Further, we looked at the cell-type specificity of these loop anchor CTCF sites in  
87 humans and see that 1334 out of 2017 (66%) RE-derived loop anchor CTCF sites were found in  
88 only one cell type (Supplementary Figure 1A). However, we did not find any specific TE family  
89 that enriches for cell-type specific loop anchor CTCF sites in the cell lines profiled  
90 (Supplementary Figure 1B).

91 To study the evolution of chromatin loops, we compared their conservation  
92 (Supplementary Methods) in matched human and mouse cell-types. Briefly, we used the  
93 liftOver tool (19) to compare loops across species and required exactly one reciprocal match  
94 (reciprocal best hit) to designate conserved loops. We found that 48% of all mouse loops (1596  
95 out of 3331) had a loop call in the corresponding syntenic region in humans (Table S1.1). Our  
96 observation is in close agreement with prior studies (1,4) that show about half of all higher-  
97 order chromosomal structures to be conserved. We then sought to characterize the  
98 contribution of TEs to various classes of loops based on their orthology.

99 We compared the origin of loop anchor CTCF sites of orthologous loops in mouse and  
100 human. We found that out of 1596 orthologous loops, 142 (8.9%) in mouse and 108 (6.7%) in  
101 human had at least one TE-derived loop anchor CTCF site (Fig 2A). In addition to orthologous  
102 loops, TE-derived loop anchor CTCF sites also gave rise to 24% (409 out of 1735) and 15% (1136  
103 out of 7852) non-orthologous (species-specific) loops in mouse and humans, respectively (Fig

104 2A), consistent with the appreciable role of TEs in genome innovation (14-16,20,21). Overall,  
105 the majority of TE-derived loop anchors in mouse were established by a handful of young TE  
106 subfamilies (B3, B2\_Mm2, B3A, B2\_Mm1t) that expanded in the rodent lineage (22) (Fig 2B). In  
107 contrast, multiple TE subfamilies of varying evolutionary ages contributed diffusely to CTCF  
108 loop anchors in humans (Fig 2C). Altogether, TEs in humans contributed to fewer orthologous  
109 loops and distributed over more TE subfamilies than in mouse.

110 Intriguingly, 123/142 (87%) TE-derived orthologous loops in mouse were discordant for  
111 TEs in humans (Table S1.2). In the sense: while the loops in humans were anchored at the  
112 putative ancestral CTCF binding sites, the syntenic ancestral CTCF motifs were largely  
113 degraded or deleted in mouse and the loops were now anchored at CTCF sites derived from  
114 nearby, co-opted TEs instead. One such example is an orthologous loop at the 5' end of the  
115 Akap8l gene (Fig 2D) maintained in mouse by a MER20 element transposed ~1.5kb upstream  
116 of the degraded ancestral motif which was well conserved in most non-rodent mammals  
117 (Supplementary Figure 2). The degradation of the ancestral CTCF motif derived from an  
118 ancient MIR3 element that is over 147 million-years-old (see *Methods*) incapacitates CTCF  
119 binding as evidenced by the CTCF-ChIP track (Fig 2E). In contrast, the younger MER20 element  
120 that inserted ~90 million-years ago harbored strong CTCF binding, providing an anchor site to  
121 maintain the conserved loop in mouse. Similarly, we find that 89/108 (82%) TE-derived  
122 orthologous loops in human GM12878 cells were discordant for TEs in mouse (Table S1.3). We  
123 hypothesized that TEs provide redundant CTCF sites and mediated binding site turnover for  
124 CTCF contributing to conserved genome folding events between human and mouse.

125 Moreover, the 123 turned-over loops in mouse represent 127 turnover events (4 loops  
126 had both loop anchors turned-over) mediated by 124 unique loop anchors (3 turned-over loop  
127 anchors tethered 2 loops each). Out of the 124 unique loop anchors, 61 events represent  
128 turnover of the left loop anchor and 63 events represent turnover of the right loop. In terms of  
129 CTCF motif orientation—for the 61 left loop anchor turnover events, 53 were positive and 8  
130 were negative; and for the 63 right loop anchor turnover events, 45 were negative and 18 were  
131 positive (Chi-square test,  $p\text{-value}=5.3\times 10^{-11}$ ). Similarly, in humans the 89 turned-over loops  
132 represent 93 turnover events (4 loops had both loop anchors turned-over) were mediated by 84

133 unique loop anchors (1 turned-over loop anchor tethered 3 loops, and 7 loop anchors tethered 2  
134 loops each). Out of the 84 unique loop anchors, 43 events represent turnover of the left loop  
135 anchor (43 positive orientation CTCF motif and 0 negative orientation CTCF motif), and 41  
136 events represent turnover of the right loop (40 positive orientation CTCF motif and 1 negative  
137 orientation CTCF motif) (Chi-square test,  $p\text{-value}=3.6\times 10^{-49}$ ). These results further lend  
138 credence to the loop extrusion model (8) and suggest that TE exaptation is more likely when  
139 the orientation of the inserted TE (and the underlying CTCF motif provided) is compatible with  
140 the local loop structure.

141

| <b>mm9 CH12-LX (n=124)</b> | Left Loop Anchor | Right Loop Anchor |
|----------------------------|------------------|-------------------|
| +ve CTCF motif             | 53               | 18                |
| -ve CTCF motif             | 8                | 45                |

142

| <b>hg19 GM12878 (n=84)</b> | Left Loop Anchor | Right Loop Anchor |
|----------------------------|------------------|-------------------|
| +ve CTCF motif             | 43               | 1                 |
| -ve CTCF motif             | 0                | 40                |

143

144 Since the mouse genome is replete with repeat-derived CTCF sites (22) that could  
145 interfere with the targeted study of specific TE candidates, we decided to validate these  
146 hypotheses in human cell lines.

147 Here we examine two candidate TEs that maintain conserved higher-order  
148 chromosomal structures in humans: one belonging to the L1M3f subfamily of LINES, and the  
149 other belonging to the LTR41 subfamily of endogenous-retrovirus-derived long terminal  
150 repeat (LTR). The former TE replaces the function of a lost ancestral CTCF site (Supplementary  
151 Figure 3), while the latter is functionally redundant for an ancestral CTCF site still present in  
152 humans (Supplementary Figure 4). These two TEs were specifically chosen as they could be  
153 unambiguously attributed to the genome folding function (no other CTCF/Cohesin binding site  
154 in the vicinity). Using CRISPR-Cas9, we obtained clones of GM12878 cells bearing homozygous  
155 deletions of the L1M3f and LTR41 elements, respectively (Supplementary Figure 5, Table S2.4).

156 We then performed HYbrid-Capture on the *in situ* Hi-C library (Hi-C<sup>2</sup>) to examine the effect of  
157 the TE deletion on the local 3D structure (8) (Table S2.1, S2.2, S2.3).

158 The L1M3f-derived CTCF site was positioned at a conserved domain border and  
159 anchored three chromatin loops (Supplementary Figure 3). Upon deletion of this L1M3f, the  
160 conserved local chromosomal structure collapsed as evidenced by (i) the loss of focal  
161 enrichment in the homozygous TE knockout (KO) contact map in comparison to the wild-type  
162 (WT) contact map, and (ii) the fusion of two neighboring domains (Hi-C<sup>2</sup> results: Fig 3A, Hi-C  
163 results: Supplementary Figure 6). The Virtual 4C plot anchored at the region surrounding the  
164 L1M3f element showed three distinct peaks (corresponding to the three loops in the WT cell  
165 line), which were lost in the KO ( $\Delta$ L1M3f) cell line. We also found that cross-domain  
166 interactions significantly increased from 8% in WT to 19% in KO cell lines ( $\sim 2.4\times$ , Welch's t-test  
167  $p\text{-value} < 1.5 \times 10^{-16}$ , Table S2.5) across the L1M3f-established domain boundary, a change  
168 specific to the targeted domain and not seen in a control domain from a nearby region (Fig 3C).  
169 Thus, the L1M3f element is necessary for maintaining the conserved loops and domain  
170 boundary in humans. It represents a novel class of binding site turnover (23-26) for CTCF  
171 leading to conservation in terms of function via establishment of long-range interactions and  
172 potentially the underlying gene regulation, but not in primary local sequence.

173 Our second candidate was a species-specific LTR<sub>41</sub>-derived CTCF site ("c" in Fig 3D, E)  
174 that replaced an ancestral CTCF site derived from a much older TE ("d" in Fig 3D, E) of the  
175 MER82 subfamily that is conserved in humans and mouse. The ancestral MER82-derived CTCF  
176 site was "decommissioned" as the LTR<sub>41</sub> insertion (after the primate-rodent split) provided a  
177 negative orientation CTCF motif upstream of the MER82 element. Based on the loop extrusion  
178 model, the LTR<sub>41</sub>-derived CTCF motif would be encountered before the MER82-derived CTCF  
179 site and hence the ancestral site is mostly decommissioned in present-day human genome as  
180 evidenced by the drastically reduced CTCF binding (Supplementary Figure 4B). In the WT  
181 contact map, we observed a bright focal enrichment corresponding to CTCF binding sites a-c  
182 suggesting a looping interaction. In contrast, there was little focal enrichment corresponding  
183 to a-d (Fig 3D, top row). Additionally, in the WT Virtual 4C track anchored on "a", we observed  
184 a clear peak corresponding to LTR<sub>41</sub> ("c") suggesting an a-c loop (Fig 3E). Upon deletion of

185 LTR<sub>41</sub>, the conserved loop's anchor is offset to the MER82-derived CTCF site ("d") downstream  
186 of the LTR<sub>41</sub> as evidenced by the shift in the focal enrichment in the KO contact map (Fig 3D,  
187 bottom row) and an increase in the KO Virtual 4C peak corresponding to the MER82-derived  
188 CTCF site (i.e., a-d loop) (Fig 3E, Supplementary Figure 7). Upon anchoring the Virtual 4C on a  
189 5-kb window containing LTR<sub>41</sub> (c), we observed a peak loss at "a" corresponding to the loss of  
190 the a-c loop in the KO, an interaction that existed in the WT cells (Fig 3F). With the ~39kb shift  
191 of the anchor site, the half-megabase scale chromosomal structure around the anchor region  
192 remained largely preserved (Supplementary Figure 4C). Upon deletion of this TE candidate,  
193 the local sequence configuration probably resembled that of the pre TE-insertion, ancestral  
194 genome. This example therefore illustrates a potential path by which the local 3D genome  
195 evolved upon insertion of the LTR<sub>41</sub> element as well as the plasticity TEs, like LTR<sub>41</sub> and  
196 MER82 in this case, can encode in their host genomes by providing redundant CTCF binding  
197 sites.

198 These results support the hypothesis that TEs are able to contribute regulatory  
199 robustness and strengthen conserved regulatory architecture as redundant or "shadow" loop  
200 anchors. The mouse genome that underwent a lineage-specific expansion of SINE B2s (22),  
201 which carry a CTCF binding motif, is saturated with such events.

202 TEs are typically silenced by host repressive machineries including DNA and histone  
203 methylation (27-29). However, a small fraction of TEs escape epigenetic silencing and provide  
204 functional regulatory elements for the host in a process termed exaptation (30-33). Since CTCF  
205 is a methylation sensitive chromatin factor and only binds to unmethylated DNA (34,35), we  
206 examined the DNA methylation levels of loop anchor CTCF sites of orthologous loops  
207 (Supplementary Methods). We found that TE-derived CTCF sites were marked by reduced  
208 DNA methylation, similar to their non-TE derived genomic counterparts (Fig 4A). To  
209 understand the DNA methylation dynamics through evolution, we took advantage of the  
210 differential mutation rate of 5-methylcytosine (5mC) to Thymine (T) (36). Unmethylated  
211 cytosines (C) mutate to T at a lower rate than 5mC; thus, methylated DNA exhibits higher  
212 frequency of C to T mutations (37). We found that TEs involved in turnover events had a  
213 significantly lower frequency of methylation-associated C-to-T and G-to-A mutations



214 compared to an identically sampled background of TEs not involved in looping (1000  
215 simulations), but no difference in all other combined substitutions (summarized human results:  
216 Fig 4B; full human and mouse results: Supplementary Figure 8, 9, Table S3). These results  
217 suggest that TEs providing CTCF turnover were hypomethylated over evolutionary time to  
218 maintain their functional role, compared to other TE copies (Fig 4C).

219

## 220 **DISCUSSION**

221 TEs have substantially contributed to higher order chromatin structures by serving as  
222 chromatin loop anchors—a large fraction of which were found to be species-specific,  
223 confirming TEs' role in genome innovation. Pioneering work in the last decade has extensively  
224 outlined this contribution of TEs in shaping gene regulatory networks by depositing TF binding  
225 sites in host genomes, leading to the origins of novel phenotypes like innate immunity and  
226 pregnancy in mammals. Herein, lies the catch: research to date showcases the role of TEs in  
227 bringing novelty and new regulatory functions to the host genome. Hence, TEs have long been  
228 considered a source of genetic innovation. However, by comparing topologies instead of raw  
229 DNA sequences in this study, for the first time, we have been able to reveal the role of TEs in  
230 3D genome conservation. This seemingly counter-intuitive role of species-specific parasitic  
231 sequences in helping maintain ancestral genome architecture is fundamentally different from  
232 all current and previous work regarding TEs' role in gene regulation. This role is mediated by a  
233 long-postulated, classic genetic phenomena of binding site turnover—for CTCF in this case.  
234 Redundant TE-derived CTCF sites in the vicinity of conserved chromatin anchor/ boundary can  
235 sometimes take over from the conserved anchor/boundary element, thus slightly shifting the  
236 anchor/boundary site while largely maintaining the 3D structure. Certain TE subfamilies like  
237 mouse SINE B2s contain pre-existing CTCF motifs within them, while others like mouse  
238 RLTR30 provide sequence fodder which upon a couple of specific point mutations can acquire  
239 CTCF binding and potentiate this binding site turnover.

240 In this study, 123 turnover events were observed in mouse on the basis of 3331  
241 annotated loops (3.7%) whereas in humans 89 turnover events were observed out of 9448  
242 loops (0.94%). This 4-fold higher rate of turnover events in mouse highlights differences in

243 between species and the turnover phenomenon being investigated. The higher rate of loop  
244 anchor CTCF turnover in the mouse genome was amplified by the arrival of CTCF-motif  
245 containing B2 elements. The genome is replete with such events and we have for the first time  
246 functionally dissected and validated them in the context of 3D genome conservation, opening  
247 the doors up for such investigations in the field for enhancer or promoter turnover events.

248         The *fons et origo* of CTCF motifs in B2 SINEs has been extensively researched. B2 SINEs  
249 are derived from tRNA genes. Mouse tRNA genes have been shown to possess classical  
250 insulator activity and the potential to function as boundary elements (38). Moreover, CTCF-  
251 binding enrichment in B2 SINEs and repeat-driven dispersal of CTCF-binding has been shown  
252 to be a fundamental, ancient, and still highly active mechanism of genome evolution in  
253 mammalian lineages (22).

254         Similarly, the role CTCF motifs in viral genome regulation has been a topic of  
255 tremendous interest and investigation. In EBV, this control involves direct binding of CTCF  
256 across the viral genome and the formation of three-dimensional loops between virus  
257 promoters and enhancers (39). CTCF has been shown to be important in the regulation of gene  
258 expression of a number of human DNA viruses (40). CTCF also plays a critical role in epigenetic  
259 regulation of viral gene expression to establish and/or maintain a form of latent infection that  
260 can reactivate efficiently (41). Recent evidence has also shown that HTLV-1 inserts an ectopic  
261 CTCF binding site forming loops between the provirus and host genome, altering expression of  
262 proviral and host genes (42). CTCF has also been shown to promote HSV-1 lytic transcription  
263 by facilitating the elongation of RNA Pol II and preventing silenced chromatin on the viral  
264 genome (43). Moreover, one can speculate that having a CTCF motif can not only help in  
265 maintaining viral genome confirmation but can also help insulate the chromatin activity of the  
266 neighborhood wherein the virus inserts into the host genome. It may also increase the chances  
267 of long-range interactions taking place which can sometimes bring in other TFs and/or  
268 polymerase, leading to enhanced transcription at the site of viral integration.

269         Our in-depth analysis of 3D genome structures upon genetic manipulation of candidate  
270 TEs revealed principles of how 3D genome evolves. In one example, a human TE provided a  
271 conserved chromatin boundary and loop anchor, whereas the ancestral CTCF site had decayed.

272 Upon deletion, the chromatin domains collapsed, and loops eliminated, underscoring the  
273 importance of the TE in maintaining the local 3D genome structure.

274 In another case where a human TE provided a similarly conserved boundary and loop  
275 anchor, the ancestral CTCF site was still recognizable but was decommissioned. Deletion of the  
276 TE resulted in reinstallation of the ancestral CTCF site to form a slightly shifted boundary and  
277 loop anchor, and the local chromatin domains were largely preserved. In this second case that  
278 we validated, we undid the events that took place during the course of (tens of millions of  
279 years) evolution by removing a young TE (LTR<sub>41</sub>) and having the ancestral “decommissioned”  
280 TE (MER82) re-uptake its function, thereby “reversing” the path of evolution in a dish (in days).  
281 Thus, experimentally demonstrating the evolutionary impact of a TE-derived CTCF site.  
282 Moreover, the concept of such shadow loop anchors residing in TEs that can be activated upon  
283 escape from epigenetic silencing is extremely crucial to take into account for studies pertaining  
284 to diseases of the epigenome like certain cancers, their treatment and therapy. This study also  
285 underscores the redundancy that exists in the genome when it comes to CTCF binding sites  
286 and can potentially explain why we may not always see a change in 3D genome structure upon  
287 deleting CTCF binding sites.

288 It is important to remember that the contribution outlined in this manuscript are  
289 underestimates as we have yet to (i) uniquely identify all loop anchor CTCF sites (especially in  
290 highly repetitive regions), (ii) annotate all repetitive elements, especially ancient TEs that have  
291 diverged far from their identity (18), and (iii) identify other architectural proteins and expand  
292 this framework beyond just CTCF-derived loop anchors.

293 While most studies highlight TEs’ role in innovating new functions by providing novel  
294 regulatory elements such as enhancers and promoters, we implicate the role of TEs in  
295 functional conservation inviting us to reexamine this unconventional role—perhaps many novel  
296 regulatory elements derived from TEs are not creating new functions, but rather providing  
297 redundant genetic material thus contributing to the robustness of gene regulatory networks.  
298 These findings will undoubtedly stimulate investigations to explore the multitude modes of  
299 regulatory evolution mediated by TEs. Indeed, recent evidence has linked the transcriptional

300 activation of retrotransposons to restructuring of genome architecture during human  
301 cardiomyocyte development (44).

302 A major caveat of the analysis presented in this study is that the *in situ* Hi-C maps (re-  
303 analyzed in this study) of the 9 cell lines were sequenced to varying depths, and thus differ in  
304 their resolution and “completeness” of loop annotations. Hence, due to this limitation of  
305 publicly available high-resolution HiC data, our findings likely represent a lower bound of TE’s  
306 involvement in shaping both the conserved and species-specific 3D genome. These analyses  
307 need to be revisited as and when higher-resolution datasets are available.

308 Lastly, our study opens the doors for population-scale genetic variation studies that  
309 identify polymorphic TE insertions to be reconciled with population-scale 3D genome and  
310 regulatory variation. These future explorations will present yet another vignette of  
311 transposable elements and their very many roles in accelerating adaptive evolution.

312

## 313 CONCLUSIONS

314 Taken together, our findings reveal a formerly uncharacterized role that TEs have  
315 played in the evolution of higher-order chromosomal structures in mammals. TEs have  
316 contributed a substantial number of loop anchors in mouse and human 3D genomes, a fraction  
317 of which were co-opted to help maintain conserved higher-order chromosomal structures. TE  
318 transposition provides redundant CTCF motifs and a novel method for CTCF binding site  
319 turnover to maintain regulatory conservation (defined here as the preservation of long-range  
320 chromosomal interactions, loop and boundary formation), by compensating for the loss of  
321 local primary sequence—local sequence that would have otherwise allowed the assessment of  
322 purifying selection. Deletion of these TEs in human cell lines eliminated the chromatin loops  
323 that they anchor and resulted in collapse of conserved chromatin structure, as expected by our  
324 hypothesis. More strikingly, we demonstrate that in another case the loop anchor shifted to an  
325 alternative TE-derived CTCF site nearby, resulting in largely unchanged chromatin structure,  
326 underscoring the dynamic nature and robustness of the 3D genome upon TE infiltration. These  
327 TEs that maintain conserved chromatin loops via turnover are hypomethylated through deep  
328 time, an observation that highlights the intimate interplay between genome, epigenome, and

329 3D genome in evolution. This research provides a foundation to study the impact of TEs and  
330 expand our understanding of chromosomal folding—its emergence, maintenance and  
331 transformation—in the context of evolving genomes. Ultimately, our study reveals how selfish  
332 genetic elements, regardless of their origins, can be repurposed to provide redundant TF  
333 motifs, maintain latent genome sanctity and regulatory fidelity by conserving 3D structure.

334

### 335 **FIGURE LEGENDS**

336 **Figure 1: Contribution of repetitive elements (REs) to chromatin loops in humans and**  
337 **mouse. (A)** Pie charts representing percentage of loops and **(B)** unique loop anchor CTCF sites  
338 derived from REs in a variety of human and mouse cell types. **(C)** Stacked bar plots showing the  
339 distribution of RE-derived anchor CTCF across major RE classes in the various human and  
340 mouse cell types. Stacked bar plots showcasing the distribution of RE-derived anchor CTCF vs.  
341 background and CTCF ChIP peaks across **(D)** major RE classes and **(E)** major RE families in  
342 matched blood lymphoblastoid cell line (mouse = CH12-LX; human = GM12878).

343

344 **Figure 2: Contribution of TEs in the conservation landscape of human and mouse loops. (A)**  
345 Venn diagram representing the various classes of chromatin loops based on their orthology  
346 and bar plots showing the contribution of REs to anchor CTCFs of each class of loops. **(B)** Age  
347 distribution and age of individual TEs that contribute loop anchor CTCF sites (black dots for  
348 orthologous loops; gold dots for non-orthologous loops) (left), total contribution to loop  
349 anchor CTCF sites (middle), distribution of orthologous and non-orthologous loops (right)  
350 derived from the top 13 TE subfamilies in mouse and **(C)** humans. Estimated primate/rodent  
351 divergence time (82 million years ago) is from (Meredith et al, 2011). **(D)** Contact maps  
352 representing a conserved chromatin loop in a syntenic region between human and mouse **(E)** A  
353 MER20 transposon insertion provides a redundant CTCF motif that helps in maintaining the  
354 conserved 3D structure via CTCF binding site turnover with remnants of the ancestral CTCF  
355 motif, well conserved in most non-rodent mammals (Supplementary Figure 2), still seen in the  
356 mouse genome.

357 **Figure 3: TEs are necessary for maintaining conserved higher-order chromosomal**  
358 **structures in humans. (A)** Results of a CRISPR/Cas9-based deletion of an L1M3f element at  
359 chr10:26–28 Mb in GM187278 cells. Mega-contact maps (details in Methods) generated using  
360 Hi-C<sup>2</sup> technology for the (top) WT locus and (bottom) KO ( $\Delta$ L1M3f) locus. **(B)** Virtual 4C plot  
361 displaying total percent interactions emanating from an anchor on a 5kb-window containing  
362 the L1M3f element. **(C)** Boxplot measuring the percent inter-domain interactions (Table S2.5)  
363 across the targeted domain and a control domain (boundaries unaffected by CRISPR edits)  
364 using subsampled contact maps (details in Methods). **(D)** Results of CRISPR/Cas9-based  
365 deletion of an LTR41 element at chr8:70.3–71.8 Mb in GM187278 cells. Mega-contact maps  
366 generated in Hi-C<sup>2</sup> experiments for the (top) WT locus and (bottom) KO ( $\Delta$ LTR41) locus. **(E)**  
367 Virtual 4C plot displaying total percent interactions emanating from an anchor on a 5kb-  
368 window containing the left anchor CTCF of the conserved loop, and **(F)** the LTR41 element.

369 **Figure 4: Turnover TEs are hypomethylated through evolutionary time. (A)** Methylation  
370 signature  $\pm$ 2kb around CTCF sites that help maintain orthologous loops segmented by the  
371 origin of the anchor CTCF site **(B)** Methylation-associated and non-methylation mutational  
372 signature of individual TEs relative to its ancestral sequence in humans (mouse TE data  
373 available in Supplementary Figure 8). Alignments were performed using crossmatch (shown  
374 here) and Needle (details in Methods, results in Supplementary Figure 9). Error bars show one  
375 standard deviation of the means from 1000 simulations. **(C)** Schematic depicting the  
376 framework of TE-mediated CTCF binding site turnover that highlights the intimate reciprocity  
377 between the TE, genome and epigenome, to help maintain conserved 3D genome.

## 378 REFERENCES

- 379 1. SSP Rao et al., *Cell* **159**, 1665-1680 (2014).
- 380 2. Z Tang et al., *Cell* **163**, 1611-1627 (2015).
- 381 3. T Sexton et al., *Cell* **148**, 458-472 (2012).
- 382 4. JR Dixon et al., *Nature*. **485**, 376-380 (2012).
- 383 5. DU Gorkin et al., *Cell Stem Cell* **14**, 771-775 (2014).
- 384 6. W Schwarzer et al., *Nature* **551**, 51–56 (2017).
- 385 7. AR Strom et al., *Nature* **547**, 241–245 (2017).
- 386 8. AL Sanborn et al., *Proc Natl Acad Sci*. **112**, E6456-E6465. (2015).
- 387 9. G Fudenberg et al., *Cell Rep*. **15**, 2038–2049 (2016).
- 388 10. V Sundaram et al., *Genome Res*. **24**, 1963-1976 (2014).

- 389 11. G Bourque et al., *Genome Res.* **18**, 1752-1762 (2008).  
390 12. G Kunarso et al. *Nat Genet.* **42**, 631-634 (2010).  
391 13. PÉ Jacques et al., *PLoS Genet.* **9**(5) (2013).  
392 14. T Wang et al., *Proc Natl Acad Sci.* **104**, 18613-18618 (2007).  
393 15. EB Chuong et al., *Science* **351**, 1083-1087 (2016).  
394 16. VJ Lynch et al., *Nat Genet* **43**, 1154-1159 (2011).  
395 17. BJ Britten, EH Davidson. *Q Rev Biol.* **46**, 111-138 (1971).  
396 18. APJ de Koning et al., *PLoS Genet.* **7** (2011).  
397 19. AS Hinrichs, *Nucleic Acids Res.* **34**, 590-598 (2006).  
398 20. C Feschotte, EJ Pritham. *Annu Rev Genet.* **41**, 331-368 (2007).  
399 21. V Sundaram, T Wang. *BioEssays.* **40**, 1700155 (2018).  
400 22. D Schmidt et al., *Cell* **148**, 335-348 (2012).  
401 23. MZ Ludwig et al., *Development* **12**, 3325-3330 (1998).  
402 24. AM Moses et al., *PLoS Comput Biol.* **2**, 130 (2006).  
403 25. S Venkataram, JC Fay. *Genome Biol Evol.* **2**, 851-858 (2010).  
404 26. D Villar et al., *Nat Rev Genet.* **15**, 221-233 (2014).  
405 27. MA Matzke et al., *Plant Mol Biol.* **43**, 401-415 (2000).  
406 28. JA Yoder et al., *Trends Genet.* **13**, 335-340 (1997).  
407 29. RK Slotkin et al., *Nat Rev Genet.* **8**, 272-285 (2007).  
408 30. A Huda et al., *Mob DNA* **1**, 2-12 (2010).  
409 31. CB Lowe, D Haussler. *PLoS One* **7**, 43128 (2012).  
410 32. G Bejerano et al., *Nature* **441**, 87-90 (2006).  
411 33. MG Kidwell, DR Lisch. *Trends Ecol Evol.* **15**, 95-99 (2000).  
412 34. C Kanduri et al., *Curr Biol.* **10**, 853-856 (2000).  
413 35. S Kurukuti et al., *Proc Natl Acad Sci.* **103**, 10684-10689 (2006).  
414 36. JC Shen et al., *Nucleic Acids Res.* **22**, 972-976 (1994).  
415 37. AP Bird. *Nucleic Acids Res.* **8**, 1499-1504 (1980).  
416 38. T Ebersole et al. *Cell Cycle.* **10**, 2779-2791 (2011).  
417 39. I Tempera et al. *PLoS Pathog* **7**:e1002180 (2011).  
418 40. I Pentland et al. *Viruses* **7**:3574-85 (2015).  
419 41. JS Lee et al. *mBio* **9**:e02372-17 (2018).  
420 42. Y Satou et al. *Proc Natl Acad Sci.* **113**(11):3054-3059 (2016).  
421 43. F Lang et al. *Sci. Rep.* **7**, 39861 (2017).  
422 44. Y Zhang, T Li, S Preissl et al., *bioRxiv.* (2018).  
423 45. RW Meredith et al., *Science* **334**, 521-524 (2011).  
424 46. RH Waterston et al., *Nature* **420**, 520-562 (2002).  
425 47. M Haeussler et al., *Genome Biol.* **17**, 148 (2016).  
426 48. MA Moreno-Mateos et al., *Nature Methods* **12**, 982-988 (2015).  
427 49. W Bao et al., *Mob DNA* **6**, 11 (2015).  
428 50. A Smit et al., RepeatMasker Open-4.0.6 2013-2015. (2017).  
429 51. P Rice et al., *Trends Genet.* **16**, 276-277 (2000).

430

431

432 **METHODS**

433 Dataset GEO accession numbers:

434 The genomic data analyzed in this study were obtained from publicly available  
435 datasets. HiC datasets were obtained from GSE63525 (mouse: CH12; humans: GM12878, HeLa,  
436 HMEC, IMR90, K562, NHEK). GM12878 ChIA-PET dataset was obtained from GSE72816.  
437 GM12878 CTCF ChIP-seq datasets were obtained from ENCODE (ENCSR000AKB and  
438 ENCSR000DZN). CH12 CTCF ChIP-seq datasets were obtained from Mouse ENCODE  
439 (ENCSR000ERM and ENCSR000DIU). WGBS methylation dataset for GM12878 was also  
440 obtained from ENCODE, GEO: GSE86765 (ENCSR890UQO). Mouse ESC and NSC HiC data was  
441 obtained from PMID: 30414923.

442

443 Loop anchor CTCF-RE intersection:

444 We generated a list of unique anchor CTCF sites using the HiCCUPS output<sup>1</sup> for various  
445 mentioned cell lines. We then overlapped loop anchor CTCF motifs identified using HiCCUPS  
446 (1) with *RepeatMasker* (RMSK v4.0.7, for hg19 and mm9) and required at least 10bp of the core  
447 CTCF motif to intersect with a repetitive element (RE) to call it a RE-derived loop anchor CTCF  
448 site. Further, only loops with (i) at least one known RE-derived anchor CTCF site, or (ii) two  
449 non-RE derived anchor CTCF sites were taken into consideration for analysis of RE-derived  
450 loop counts, because we can definitively say whether the loops and their loop anchor CTCF  
451 sites were derived from REs or not. Loops with both unidentified loop anchor CTCF sites, or  
452 one unidentified and one non-RE derived anchor CTCF site were not considered as there is the  
453 possibility of having at least one of the other anchor CTCF sites derived from a RE. We followed  
454 the same methodology when considering ChIA-PET loops.

455

456 TE class and family distribution

457 We ran RepeatMasker v4.0.7 with the -s slow search parameter on the hg19 and mm9  
458 genomes to obtain a comprehensive list of REs in the genome and their corresponding  
459 subfamily, family and class annotations. We used RE counts (generated as previously outlined)  
460 to characterize their distribution to loop anchor CTCF sites. For characterizing RE-derived  
461 CTCF binding peaks, we repurposed a previously used strategy (10). Briefly, we required that  
462 the centers of the MACS-called peaks of ENCODE-generated CTCF ChIP datasets overlapped  
463 with RE fragments. We used the length distribution of various RE family and classes in the  
464 entire genome as the background distribution.

465

466 Loop orthology check:

467 We used liftOver (19) to convert CH12 loop annotations from mm9 mouse genome  
468 coordinates to hg19 human genome coordinates. We used various sequence match rates  
469 (minMatch = 0.05, 0.1..., 1) to convert CH12 mouse peaks from mm9 genome coordinates to  
470 hg19 genome coordinates. To optimize for the minMatch parameter, we generated ten



471 shuffled (randomized) peak annotations by using bedtools shuffle -chrom command to  
 472 permute their location on the chromosome of origin. minMatch parameter of 0.1 was chosen  
 473 for liftOver analyses henceforth, as it resulted in the greatest number of features being lifted  
 474 over (on average) and lower coefficient of variation across the 10 simulated sets. We lifted over  
 475 3245 out of 3331 mouse peaks from mm9 to hg19, using the minMatch 0.1, to facilitate cross-  
 476 species peak annotations comparison. To call a mouse feature conserved in humans, we  
 477 required that the loop anchor pairs individually lie within a min(half of loop length, vicinity  
 478 threshold) window of an existing loop anchor pair. The vicinity threshold was put in place to  
 479 account for cross-species liftOver errors and facilitate comparison of higher-order  
 480 chromosomal features that vary from 120Kb to 125Mb in length (in mouse). We tested multiple  
 481 vicinity thresholds ranging from 500bp to 100Mb and identified false discovery rates using  
 482 simulated sets of mouse features and comparing them to the orthology observed between the  
 483 real CH12 (mouse) and GM12878 (human) features. We decided to use 50kb as the vicinity  
 484 threshold as it corresponded to a false discovery less than 0.1. We found that 1688 CH12  
 485 mouse peaks overlapped at least one corresponding peak in GM12878 human lymphoblastoid  
 486 cells. We performed a similar analysis to compare 'muranized' human features (liftOver from  
 487 GM12878) to actual mouse features (CH12). We found that 1900 GM12878 human peaks  
 488 overlapped at least one corresponding peak in CH12 mouse lymphoblastoid cells. We then  
 489 filtered for features that displayed reciprocal matches (reciprocal best hits) in the two  
 490 comparisons (mouse-to-human and human-to-mouse) as stated above. Finally, we curated the  
 491 list by considering genic, epigenomic and transcriptomic synteny to pick exactly one  
 492 orthologous human loop to a corresponding mouse loop, to enlist 1596 high-confidence  
 493 orthologous peak calls (Table S1.1). A brief flowchart of the pipeline is shown below:

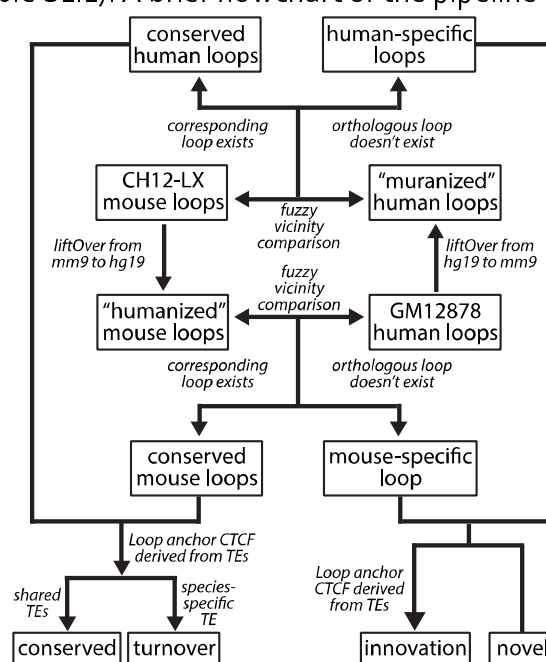

494  
 495

496 TE age estimation:

497 Species divergence times were based on (45). Repeat ages were estimated by dividing  
498 the percent divergence of extant copies from the consensus sequence by the species neutral  
499 substitution rate. Substitution rates (mutations/yr) used were as follows: humans:  $2.2 \times 10^{-9}$ ;  
500 mouse:  $4.5 \times 10^{-9}$ , from (46). Jukes-Cantor and Kimura distances were calculated by aligning  
501 each TE to its consensus sequence and counting all possible mutations (see below). Single  
502 nucleotide substitution counts were normalized by the length of the genomic TE minus the  
503 number of insertions (gaps in the consensus). These mutation rates were then used to calculate  
504 the Jukes-Cantor and Kimura distances for each genomic TE.

505

506 Candidate selection and filtering:

507 After manually curating the list of conserved loops, we looked for TE-derived  
508 orthologous loops in humans that were discordant for TEs in mouse. After identifying the list  
509 of TE-derived CTCF turnover events in humans, we comprehensively surveyed the local CTCF  
510 binding landscape (CTCF ChIP-seq peaks) to ensure (i) there weren't other CTCF binding sites  
511 in the vicinity that could function as loop anchors in humans (in the first case); and (ii) there  
512 was only one other unique CTCF binding site, i.e. the ancestral CTCF motif (in the second case).  
513 We also ensured that the TE insertion from which the loop anchor CTCF site was derived was  
514 human-specific and not present in mouse (Table S1.2). We repeated this analysis to identify  
515 TE-mediated turnover in mouse as well (Table S1.3). We also identified events wherein TEs  
516 mediated turnover events both in mouse as well as human (Table S1.4). One possible  
517 explanation for this observation is that similar selective pressures (i.e. the need to maintain  
518 higher-order chromosomal structure) led to the convergent co-option of species-specific TEs  
519 at syntenic locus, independently in both the genomes.

520

521 Cell culture methods:

522 GM12878 cell lines were grown between 200K-800K cells/ml in 10ml cultures in T-25  
523 flasks, in a humidified incubator with 95% CO<sub>2</sub> at 37°C in RPMI1640 media (Gibco, 1187-085)  
524 supplemented with 15% fetal bovine serum (Corning, 35-011-CV) and 100U/ml penicillin-  
525 streptomycin (Gibco, 15140-122) as per the ENCODE standards.

526

527 CRISPR-Cas9 mediated genome engineering:

528 Our CRISPR workflow consisted of the following steps: We identified turned over  
529 chromatin loops that are maintained by TEs, with unique, correctly oriented TE-derived CTCF  
530 motifs within loop anchors (1). We used two independent CRISPR sgRNA design engines  
531 CRISPOR (47) and CRISPRScan (48) to rationally design multiple pairs of sgRNAs that have  
532 high cutting efficiency and minimizing off-target effects. We used pU6-(BbsI)\_CBh-Cas9-T2A-  
533 BFP plasmid (Addgene, 64323) and pU6-(BbsI)\_CBh-Cas9-T2A-mCherry plasmid (Addgene,

534 64324) as the CRISPR delivery vectors. For each sgRNA, we designed and annealed two single-  
535 stranded oligos with compatible overhangs that can be cloned into BbsI-digested BFP and  
536 mCherry CRISPR vectors through standard ligation techniques. For every pair of sgRNAs, we  
537 constructed BFP-CRISPR vectors and mCherry-CRISPR vectors that express sgRNAs targeting  
538 upstream and downstream of the candidate TEs, respectively. BFP-CRISPR vectors and  
539 mCherry-CRISPR vectors each were co-transfected into GM12878 cells in antibiotic-free media  
540 using the Neon transfection system. After 24 hours of incubation, the transfected cells were  
541 analyzed by flow-cytometry (Beckman Coulter MoFlo) for BFP-positive and mCherry-positive  
542 subpopulations. Transfection efficiencies were usually between 3-5%. We single-cell sorted  
543 these double-positive fluorescent cells into 96-well plates for clone expansion and allowed to  
544 grow for 21-28 days. After that, 20-48 clones were screened per transfection. Genomic DNA  
545 from CRISPR clones was extracted using *Quick-DNA* Miniprep kit for genotyping and validated  
546 with Sanger sequencing. Details of sequences used to generate clones used in this study are  
547 listed in Table S2.4. We then performed *in situ* Hi-C on the selected mutated cell lines and  
548 performed hybrid selection on the *in situ* Hi-C libraries for a region around the targeted TE to  
549 generate Hi-C<sup>2</sup> libraries that can easily and cheaply be sequenced to read off the effects of our  
550 TE deletions on local genome folding.

551

#### 552 Hi-C<sup>2</sup> probe design:

553 To design probes targeting the two regions for HYbrid Capture Hi-C (Hi-C<sup>2</sup>), we  
554 followed a similar approach as (8). In short, we (i) identified all MboI restriction sites within the  
555 target region, (ii) we designed our bait probe sequences to target sequences within a certain  
556 distance of the MboI restriction sites as Hi-C ligation junctions occur between them, (iii) we  
557 followed a similar three-pass probe design strategy sequentially increasing various parameters  
558 like the distance of the probe from the MboI restriction site, the number of repetitive bases,  
559 the GC content, probe density in gaps with relaxed probe design quality filters. We then  
560 removed overlapping probes or probes with identical sequences. After all three passes, we  
561 identified 2741 unique probes covering region 1 (chr10:26-28Mb; 1.37 probes/kb) and 1856  
562 probes covering region 2 (chr8:70.3-71.8Mb; 1.24 probes/kb). 15bp primer sequences (unique  
563 for each region, details in Table S2.3) were then appended to both ends of the 120bp probe  
564 sequence to facilitate single oligo pool synthesis and subsequent amplification of region-  
565 specific sub-pools. Probe construction and hybrid selection was then followed with sequences  
566 specific to this study using the same strategy detailed in (8).

567

#### 568 Hi-C experiments:

569 The Hi-C datasets used in our analyses were generated using the *in situ* Hi-C protocol  
570 standardized by the 4DN consortia. In brief, the *in situ* Hi-C protocol involves crosslinking cells  
571 with 1% formaldehyde for 10 minutes, permeabilizing them with nuclei intact, digesting the

572 DNA with Mbol (4-cutter restriction enzyme), filling the 5'-overhangs while incorporating  
573 biotin-14-dATP (a biotinylated nucleotide), followed by ligating the resulting blunt-end  
574 fragments, shearing the DNA to a 400-700bp fragment size, capturing the biotinylated ligation  
575 junctions with streptavidin beads, building an Illumina library with 10-12 rounds of PCR  
576 amplification, and finally analyzing the resulting fragments with paired-end sequencing. The  
577 resulting library was always shallow sequenced to 500K-4M reads to check for library build  
578 quality looking at key statistics such as complexity, number of Hi-C contacts, inter vs.  
579 intrachromosomal interactions, and long-range vs/ short-range intrachromosomal  
580 interactions. Libraries that passed the quality check were either sequenced deeper and/or used  
581 as pools for subsequent Hi-C<sup>2</sup> experiments.

582 For our genome engineering experiments, we generated 14 *in situ* Hi-C libraries (Table  
583 S2.1) from GM12878 cells. We also generated 16 *in situ* Hi-C<sup>2</sup> libraries from various genome-  
584 engineered GM12878 cell lines on which we performed hybrid selection. All *in situ* Hi-C libraries  
585 generated as part of this study are detailed in Table S2.2. All the Hi-C data was processed using  
586 the computational pipeline described in full detail in (1). Hi-C libraries were sequenced to a  
587 depth of between 624K-333M reads (on average, 63.8M reads). Hi-C<sup>2</sup> libraries were sequenced  
588 to a depth of between 6.7M-168M reads (on average, 35.8M reads). All data was initially  
589 processed using the pipeline published in (1) and visualized on the desktop and web version of  
590 Juicebox. We combined Hi-C and Hi-C<sup>2</sup> contact maps corresponding to the same genotype and  
591 the same locus using the Juicer's mega.sh script as these are in essence "biological" replicates,  
592 to generate higher resolution megamaps.

593

#### 594 Analysis of cross-domain interactions:

595 We subsampled the Hi-C<sup>2</sup> corresponding to the R1-WT megamap (containing 46M  
596 reads) and R1-KO (containing 56M reads) for 5M reads, 10 times to create 10 independent R1-  
597 WT and R1-KO mini-maps. For each of these HiC maps, we used the Juicer Tools dump  
598 command to extract the raw contact matrix. Intradomain interactions were defined as  
599 interaction that (i) originate and terminate in domain 1, or (ii) originate and terminate in  
600 domain 2. Interdomain interactions were defined as interactions that originate in domain 1 and  
601 terminate in domain 2. We then calculate percentage of cross-domain interactions for each of  
602 the mini-maps using the formula: (number of intradomain-interactions)\*100 / ((number of  
603 intradomain-interactions) + (number of interdomain-interactions)). The percentage of cross-  
604 domain interactions were calculated for the target domain as well as a control domain. The  
605 distribution of cross-domain interactions across the targeted domain was found to be  
606 significantly different in the KO vs. the WT (t-Test: Two-Sample Assuming Unequal Variances,  
607 p-value = 1.40668x10<sup>-16</sup>). The distribution of cross-domain interactions across a nearby control  
608 domain however was not found to be significantly different in the KO vs. the WT (t-Test: Two-

609 Sample Assuming Unequal Variances,  $p$ -value = 0.013254165). Raw simulation data and  
610 statistics are provided in Table S2.5.

611 For Figure S3C, we used the Hi-C megamap corresponding to R2-WT and R2-KO to  
612 retrieve raw interaction counts at a 100kb resolution. Percent cross-domain interactions was  
613 calculated using the formula stated above. We calculated the enrichment of cross-domain  
614 interactions in the LTR41-DKO w.r.t. the WT across the targeted domain as well as a nearby  
615 control domain.

616

#### 617 DNA Methylation analysis:

618 We generated a methylation metaplot representing the mean CpG methylation value  
619 from WGBS data (ENCODE dataset: ENCF835NTC) of 20bp sliding windows, centered on  
620 CTCF motifs (and  $\pm 2$ kb around it) segmented by their origin/TE-derivation status.

621

#### 622 Analysis of TE Mutational Profile:

##### 623 1. TE consensus construction

624 For most of the TE subfamilies, we retrieved the consensus sequences from the  
625 RepBase library (RepBase 22.02, RepeatMaskerEdition20170127) (49). However, LINE  
626 elements are fragmented to 5' end, ORF2 and 3' end regions in RepBase library. To reconstruct  
627 full-length LINE consensus, we identified TE fragments in human and mouse genome using  
628 RepeatMasker and compared the standard output (.out file) with the alignment output (.align  
629 file) from the same RepeatMasker run (50). For each LINE element in the standard output, we  
630 summarized which 5' end, ORF2, and 3' end fragments have been used most to construct the  
631 full-length element. Then we use EMBOSS Water local alignment algorithm to align the three  
632 pieces together and generated the full-length LINE consensus sequences (51).

##### 633 2. Crossmatch alignments

634 We ran RepeatMasker 4.0.7 on the mm9 and hg19 genomes using crossmatch as the  
635 search engine. We then parsed the alignment file to determine the substitution rates between  
636 the ancestral sequence and the genomic element. For each genomic element, we counted the  
637 number of A-to-C, A-to-G, A-to-T, C-to-A, C-to-G, C-to-T, G-to-A, G-to-C, G-to-T, T-to-A, T-  
638 to-C, and T-to-G substitutions (single nucleotide substitutions), where the first nucleotide  
639 indicates the ancestral sequence and the second nucleotide indicates the genomic sequence.  
640 We ignored any substitutions that involved ambiguous nucleotides. We also counted the  
641 number of insertions and deletions. All substitution frequencies were normalized by the length  
642 of the genomic sequence to estimate the substitution rates in each TE. Any genomic TE with a  
643 length less than 20% of the ancestral sequence was filtered out. For each single nucleotide  
644 substitution, we calculated the average substitution rate in two subsets of TEs (details below).  
645 We also calculated the combined C-to-T and G-to-A substitution rate (methylation-associated  
646 substitutions) and the combined rate of all other substitutions (non-methylation-associated

647 substitutions) to compare the rate of DNA methylation-induced mutations to other mutations.  
648 The methylation substitution rate was computed by taking the average of the C-to-T and G-to-  
649 A rates for each TE and then averaging over turnover events. The non-methylation substitution  
650 rate was computed by taking the average of all other (ten) single nucleotide substitutions for  
651 each TE and then averaging over turnover events.

652 We generated a background distribution by repeating this analysis on 1000  
653 permutations of all genomic TEs. We first calculated the frequency of each TE subfamily in the  
654 set of turnover events. For each permutation, we randomly selected genomic TEs (not involved  
655 in anchoring loops) from each subfamily to reflect their frequency in turnover events. The  
656 single nucleotide substitution rate, methylation-associated substitution rate, and non-  
657 methylation-associated substitution rate were calculated as described above. The distribution  
658 of all substitution rates from the permutations follow a normal distribution (KS test,  $P >$   
659  $0.0036$ , Bonferroni correction  $\alpha = 0.05$  for  $N = 14$  hypotheses, Supplemental Table S3.1).  
660 The background distribution was then used to perform a left-tailed z-test. We did not compute  
661 a two-tailed p-value because our null hypothesis is that the observed mutation rates are  
662 greater than or equal to the background distribution mean. For the 12 single nucleotide  
663 substitutions, we used Bonferroni correction to account for multiple hypotheses.

### 664 3. Needle realignments

665 RepeatMasker performs post-processing after running crossmatch, so coordinates and  
666 TE subfamily assignments in the .out file do not always reflect the contents of the .align file. To  
667 improve our estimates of mutation rates, we realigned each TE to its matched consensus  
668 sequences. We extracted the genomic and subfamily consensus sequence using the  
669 coordinates reported in the .out file. We then performed a global alignment using EMBOSS  
670 Needle v6.6.0.0 using a gap open penalty of 10, a gap extension penalty of 0.5, and the  
671 EDNAFULL scoring matrix. We used the alignment to recompute single nucleotide  
672 substitutions for each TE and then repeated the same analysis we used for crossmatch  
673 alignments. We did not filter out TEs with a length less than 20% of the ancestral sequence  
674 because this filter was originally put in place to account for discrepancies between the .align  
675 and .out files. As before, the distribution of all substitution rates from the permutations follow  
676 a normal distribution (KS test,  $P > 0.0036$ , Bonferroni correction  $\alpha = 0.05$  for  $N = 14$   
677 hypotheses, Supplemental Table S3.2).

678

## 679 **DECLARATIONS**

680

681 **Ethics approval and consent to participate** Not applicable

682

683 **Consent for publication** Not applicable.

684

685 **Availability of data and material** The data sets generated and analyzed in this current study  
686 will be uploaded to GEO upon acceptance

687

688 **Competing Interests** Authors declare no competing interests.

689

690 **Funding** M.N.K.C. was partly supported by the Precision Medicine Pathway, Washington  
691 University; H.S.J. was partly supported by NIH grant T32 GM007067; X.Z. was partly supported  
692 by R25DA027995; T.W. is supported by R01HG007175, U01CA200060, U24ES026699,  
693 U01HG009391, U41HG010972 and American Cancer Society RSG-14-049-01-DMC.

694

695 **Authors' Contributions** M.N.K.C. and T.W. conceived and designed this study; M.N.K.C.  
696 analyzed the data, performed experiments, generated sequencing libraries, and wrote the  
697 manuscript with inputs from T.W.; R.Z.F., J.T.W., and X.Z. contributed text and revised the  
698 manuscript; H.S.J. contributed reagents and resources; R.Z.F performed mutation frequency  
699 simulations along with M.N.K.C.; X.Z. generated TE ancestral sequences and TE alignments;  
700 T.W. supervised the project. All authors subsequently edited and approved the final  
701 manuscript.

702

703 **Acknowledgements** We thank members of the Wang Lab for helpful discussions related to the  
704 project; Jessica Hoisington-López and Maria Lynn Jaeger from The Edison Family Center for  
705 Genome Sciences & Systems Biology for assistance with sequencing; Matthew Patana &  
706 Daniel Schweppe from the Siteman Flow Cytometry core for FACS expertise.

707

708 **Corresponding Author** Correspondence and requests for materials should be addressed to  
709 Ting Wang.

710

711 **Supplementary Materials**

712 Table S1 – S3

713 Supplementary Figure 1 – 9

## FIGURE 1

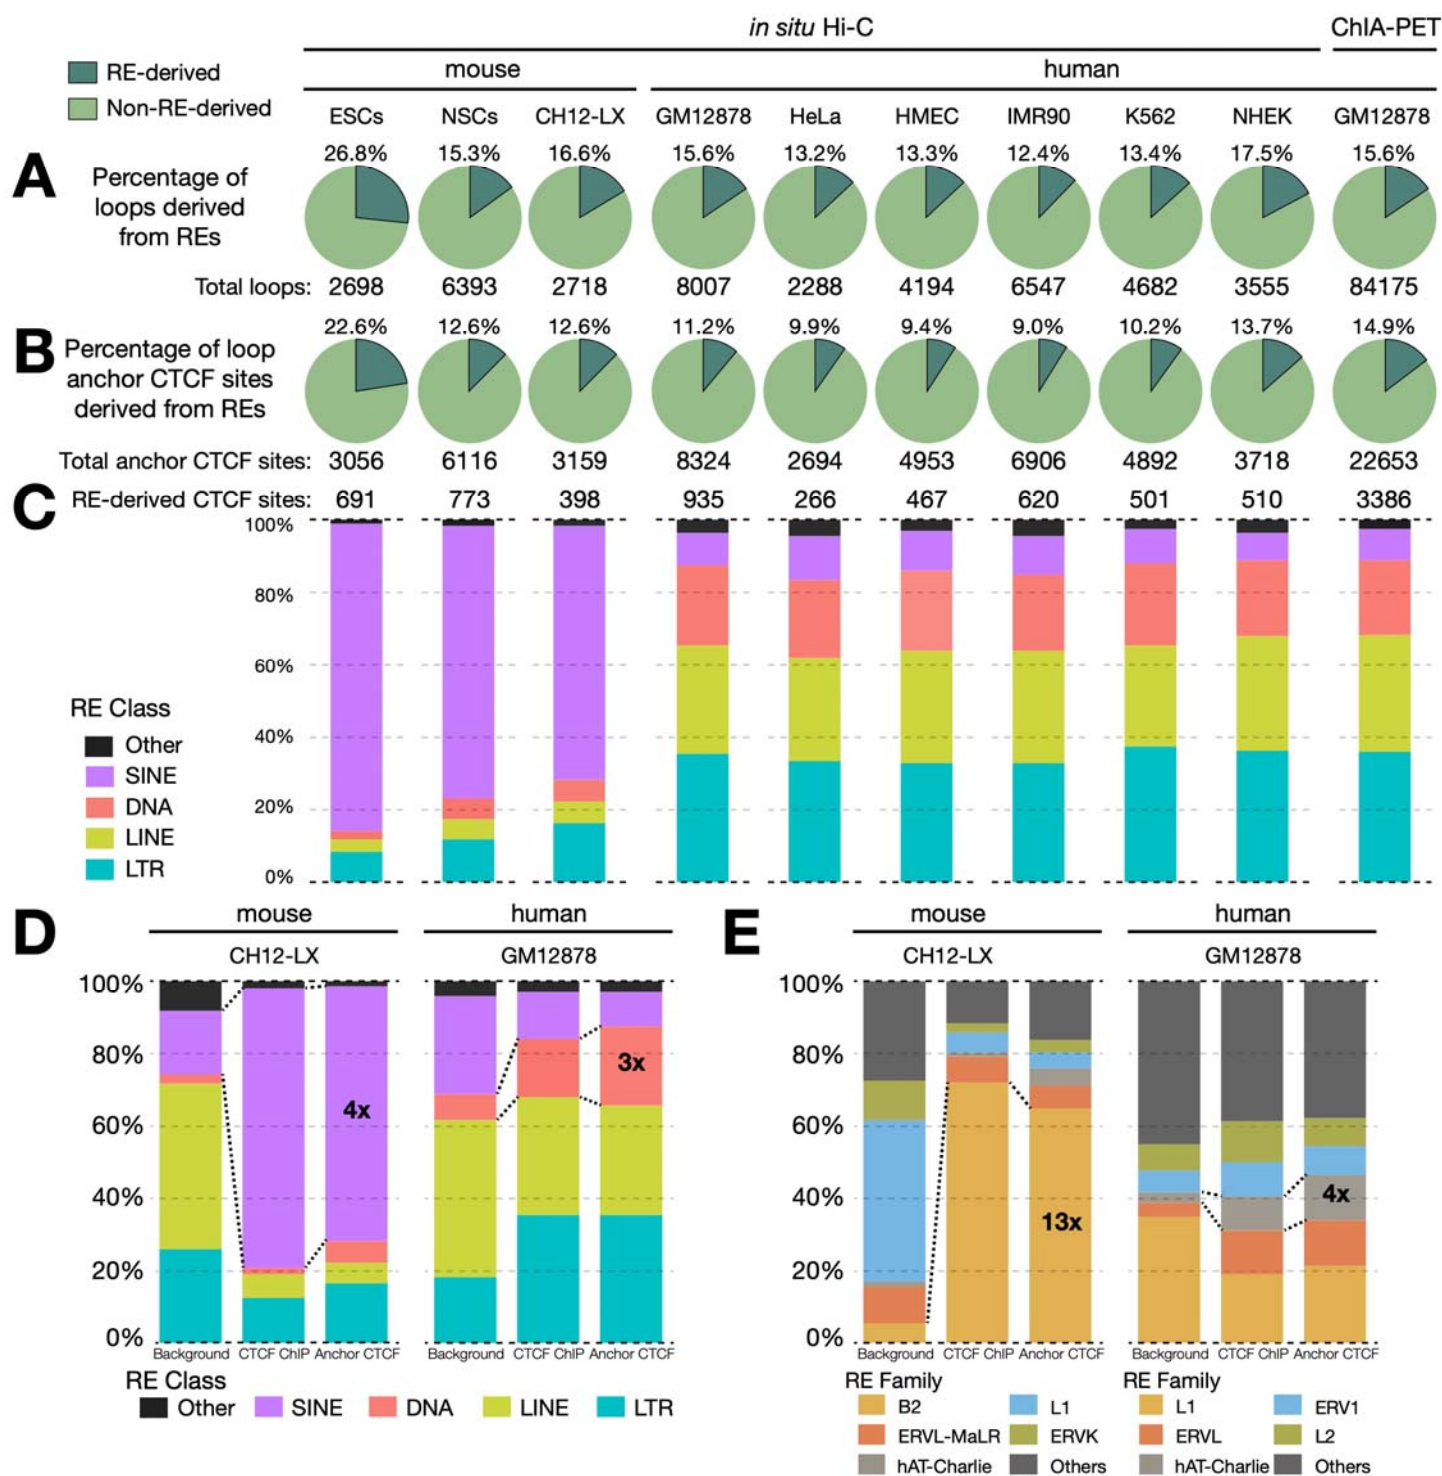



## FIGURE 2

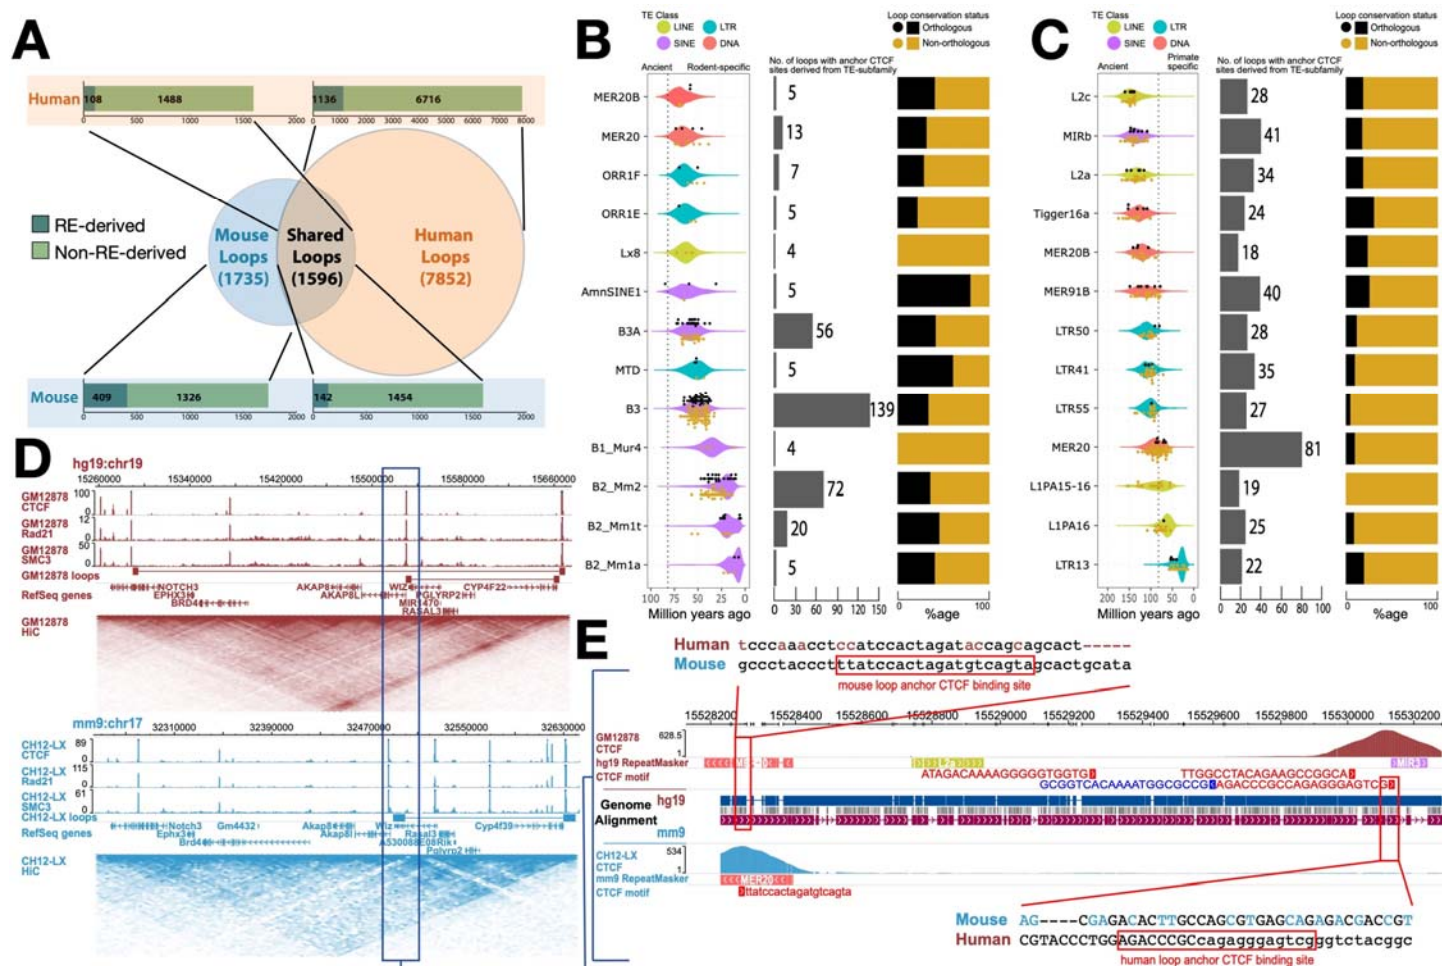

## FIGURE 3

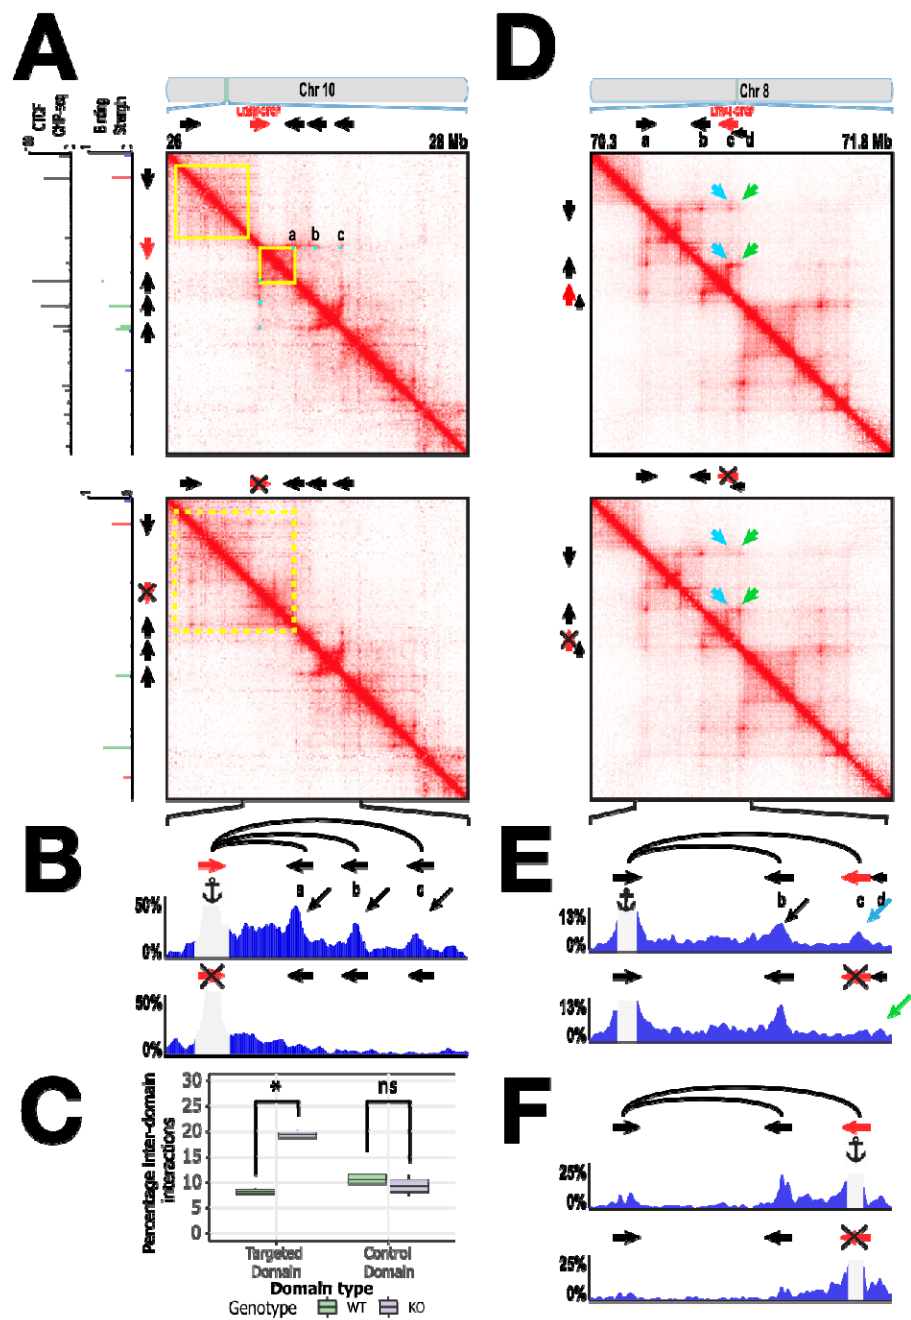

## FIGURE 4

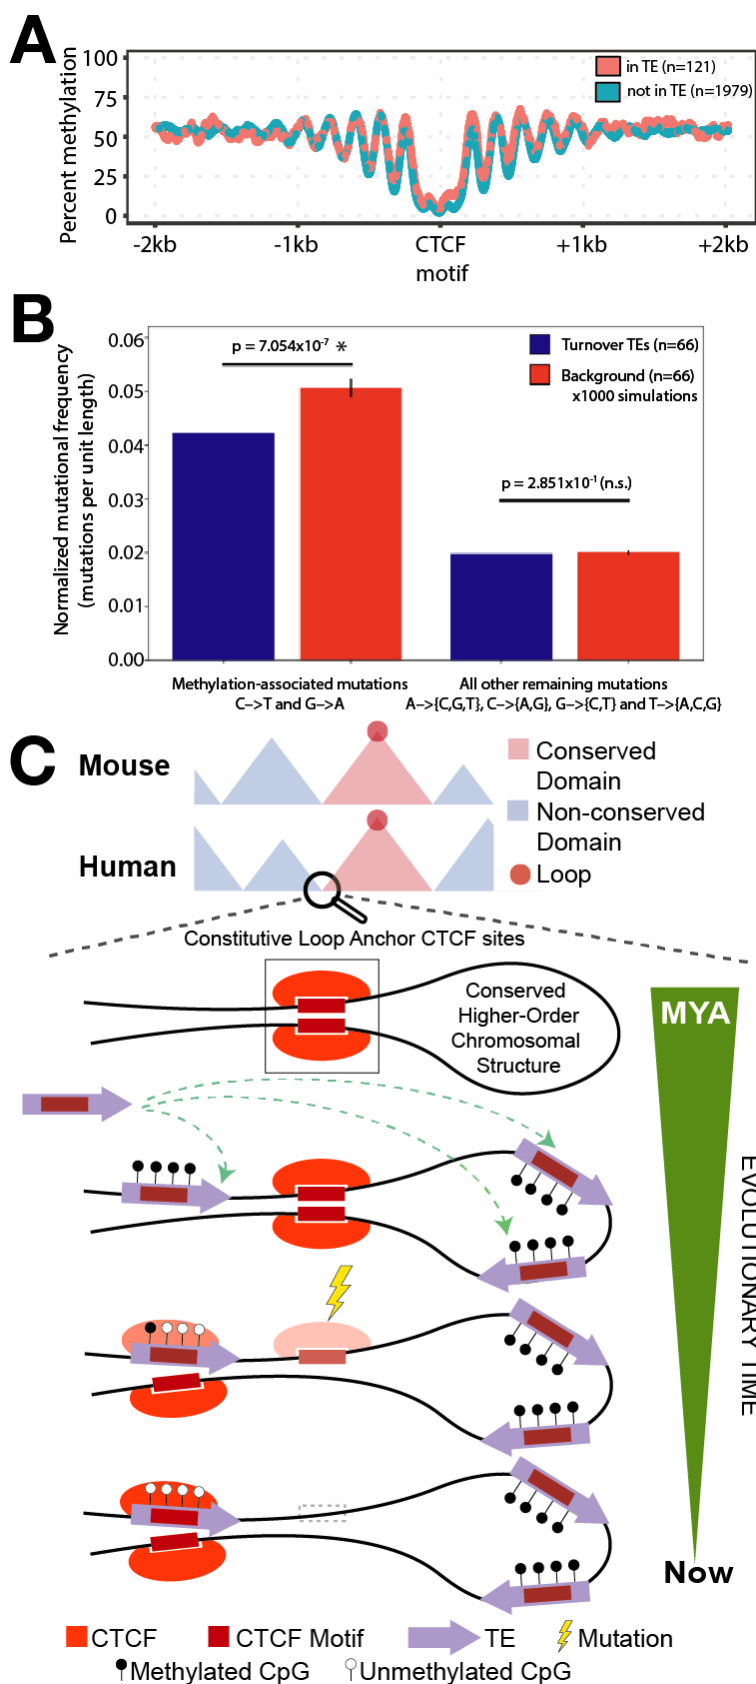

Source: https://www.biorxiv.org/content/10.1101/485342v2.full.pdf
